# Supplementary material for: Comparative Transcriptome Analysis of Female and Male Fine-Patterned Puffer: Identification of Candidate Genes Associated with Growth and Sex Differentiation
Source: MDPI journal article supplement (doi:10.3390/fishes6040079), 2021-12-12
Supplement: s1 [file s1]

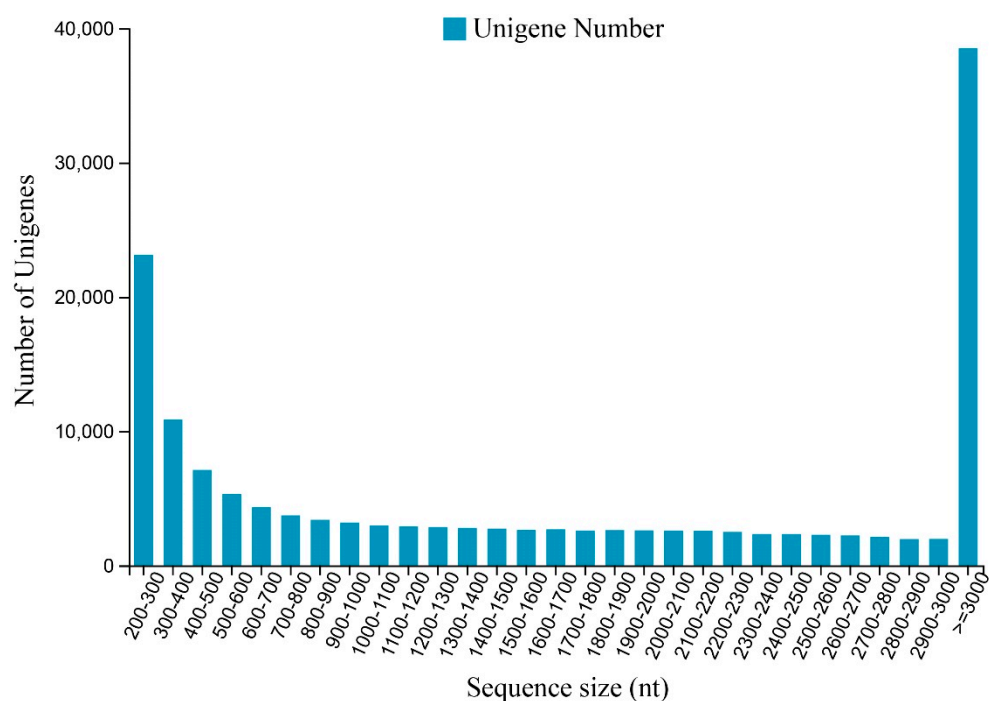

**Figure S1.** The length distribution of the unigenes.

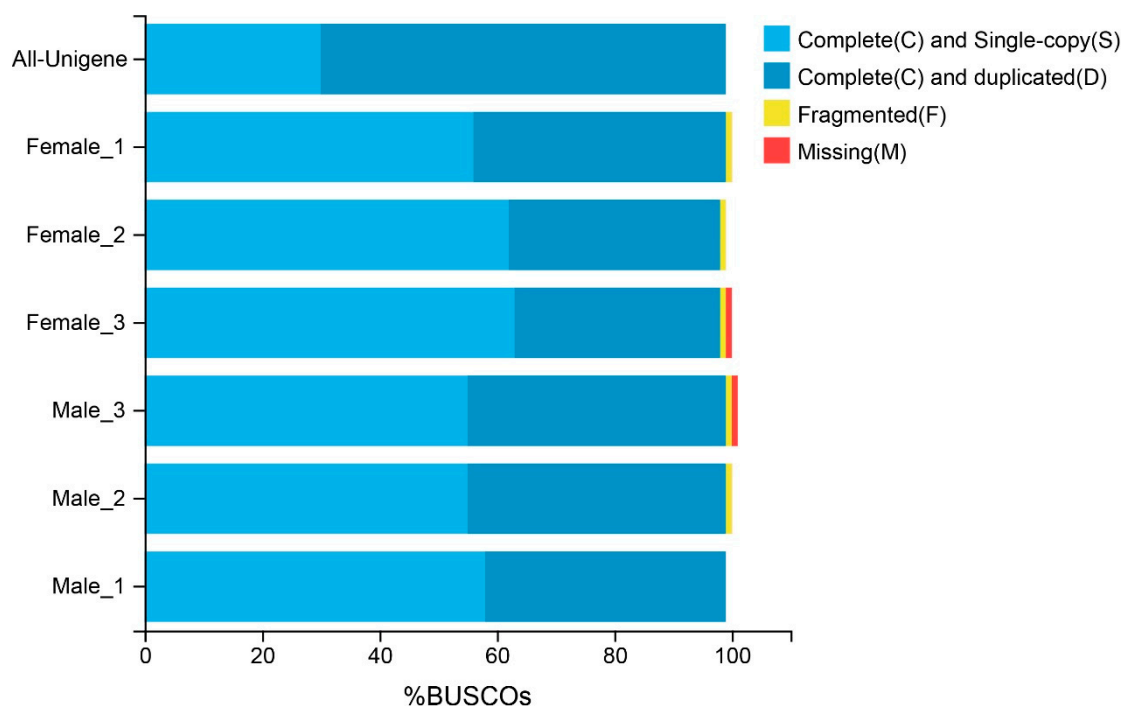

**Figure S2.** Completeness of the assembly and annotations.

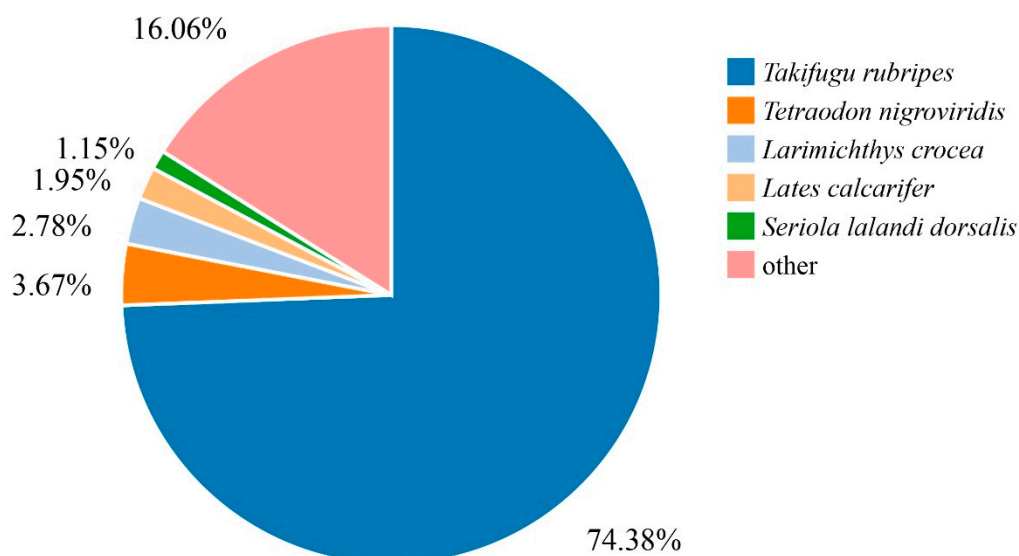

**Figure S3.** Distribution of the unigene hits by species in the NR database.

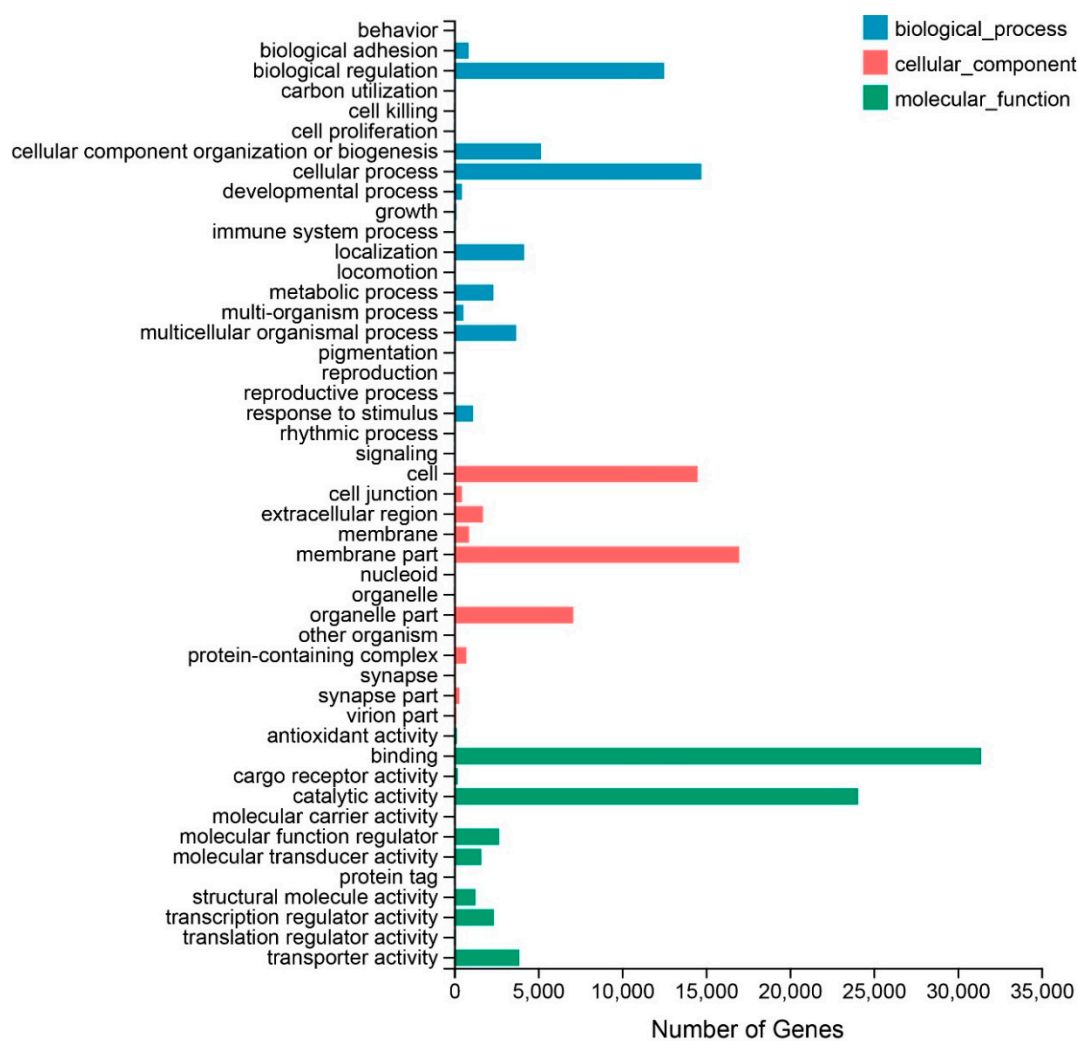

**Figure S4.** GO terms for the DEGs in the biological process, cellular component, and molecular Figure S1. Specific primers for the selected unigenes and reference genes.

**Table S1.** Characters of six specimen used in the present study

| Sample   | SL (mm) | BW (g) | Age (year) | MS |
|----------|---------|--------|------------|----|
| Female-1 | 213     | 231    | 4          | IV |
| Female-2 | 146     | 210    | 3          | IV |
| Female-3 | 143     | 213    | 3          | IV |
| Male-1   | 137     | 142    | 3          | IV |
| Male-2   | 145     | 207    | 3          | IV |
| Male-3   | 141     | 182    | 3          | IV |

SL: standard length; BW: body weight; MS: maturation stage of gonad

**Table S2.** Top 20 pathways of GO enrichment analyses.

| Access number | Classifications                            | Unigenes number |
|---------------|--------------------------------------------|-----------------|
| GO:0016021    | Integral component of membrane             | 1093            |
| GO:0005524    | ATP binding                                | 520             |
| GO:0005634    | Nucleus                                    | 388             |
| GO:0046872    | Metal ion binding                          | 221             |
| GO:0003677    | DNA binding                                | 220             |
| GO:0003676    | Nucleic acid binding                       | 182             |
| GO:0008270    | Zinc ion binding                           | 175             |
| GO:0004672    | Protein kinase activity                    | 138             |
| GO:0005737    | Cytoplasm                                  | 132             |
| GO:0005509    | Calcium ion binding                        | 125             |
| GO:0003723    | RNA binding                                | 117             |
| GO:0003700    | DNA-binding transcription factor activity  | 103             |
| GO:0005525    | GTP binding                                | 93              |
| GO:0005886    | Plasma membrane                            | 90              |
| GO:0004674    | Protein serine/threonine kinase activity   | 88              |
| GO:0043565    | Sequence-specific DNA binding              | 77              |
| GO:0005576    | Extracellular region                       | 77              |
| GO:0003924    | GTPase activity                            | 74              |
| GO:0006355    | Regulation of transcription, DNA-Templated | 70              |
| GO:0003779    | Actin binding                              | 68              |

**Table S3.** Specific primers for the selected unigenes and reference genes.

| Unigene        | Primers Sequences (5'to3')                        | E (%)   |
|----------------|---------------------------------------------------|---------|
| CL12876        | F-ACAGCAAAGAGGTGGTGGCA<br>R-TTCTCCATTACAGTCGCGGC  | 95.39%  |
| Unigene147     | F-TCTTGCTGTTTGGCCTTGGA<br>R-CCCAATTGTGTGCCTTGACC  | 102.59% |
| CL212          | F-CAATGTGCGGAAGCAGATGT<br>R-GCCATACAATGCCACCCTCT  | 100.45% |
| Unigene16662   | F-CCGCCAGATGACCTTGTGTT<br>R-CCAGCCCCTTGATCTCATCA  | 109.65% |
| Unigene15730   | F-GTTTCAGCAATGGTGCGGTC<br>R-AGCGGCTGCAACAAGACAGT  | 96.49%  |
| CL5341         | F-CGGTGTTTTTGCTCCTTTGC<br>R-TGGAACCAAATACCCGATGC  | 106.61% |
| CL1574         | F-TGACGCAACCACTGGATTCA<br>R-CAGATTGAGCCGCAGAAAGG  | 95.13%  |
| CL2700         | F-ATGGTATCGGCTGGCTGACA<br>R-GCTCCCCTCGTATGGCTTGT  | 101.76% |
| CL10581        | F-GCTCATCTGATTCCCGCTCA<br>R-GCACATGCAGGTGTTGCATC  | 94.62%  |
| Unigene17155   | F-CATTTTTCTGGCGACCATCG<br>R-ATCTGCGCCGTCACAAATGTT | 110.05% |
| $\beta$ -actin | F-CAGCATCATGAAGTGCGACG<br>R-TTCTGCATCCTGTCGGCAAT  | 90.81%  |
| 18S            | F-AAGCGAAAGCATTGCGCAAG<br>R-GGCATCGTTTATGGTCGGAA  | 94.86%  |

E: amplifying efficiency for each pair of primer
